# Supplementary material for: Obesity inhibits the osteogenic differentiation of human adipose-derived stem cells
Source: PubMed Central journal article supplement (PMC4730660; doi:10.1186/s12967-016-0776-1), 2016-01-27

A

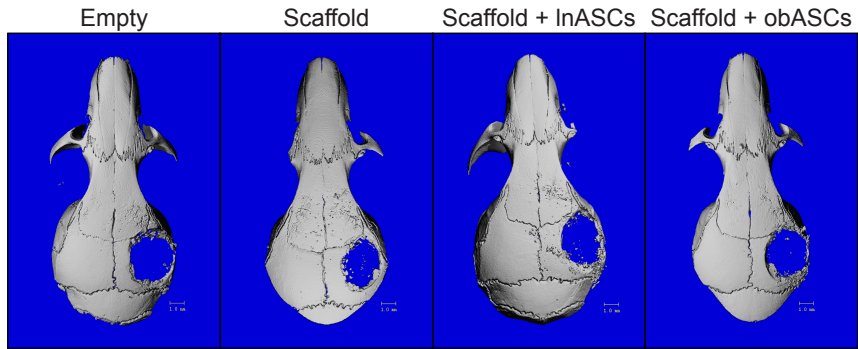

B

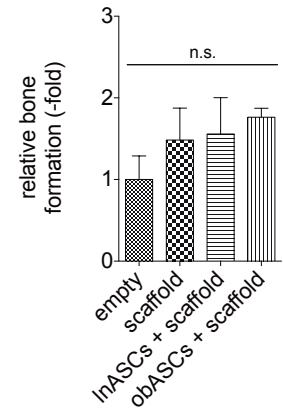

Supplement: 12967_2016_776_MOESM3_ESM.pdf [file 12967_2016_776_MOESM3_ESM.pdf]
